# Supplementary material
Source: publisher figshare collection journal article supplement (https://frontiersin.figshare.com/ndownloader/files/24022538)
Supplement: Supplementary file 1 [file 24022538]

**Supplementary Table S1. Summary of Pacific copepod mean abundance (indiv. m−3) reported in the southern Chukchi Sea.**

| **Year** | ***Eucalanus bungii*** | ***Metridia pacifica*** | ***Neocalanus* spp*.*** | **Reference** |
| --- | --- | --- | --- | --- |
| 2007 | 151.49 ± 187.43 | 249.35 ± 304.97 | 7.36 ± 8.02 | Matsuno et. al. 2011 |
| 2009 | 7.80 | 71.60 | 2.75 | Ershova et. al. 2015a |
| 2012 | 3.02 | 11.29 | 3.45 | Ershova et. al. 2015a |
| 2014 | 3.00 ± 1.41 | - | 0.33 ± 0.47 | This study |
| 2015 | 843.33 ± 327.97 | 28.33 ± 28.89 | 2.33 ± 3.30 | This study |
| 2016 | 2.91 ± 2.70 | 6.76 ± 4.89 | 0.74 ± 1.05 | This study |
